# Supplementary material
Source: PubMed Central journal article supplement (PMC4640128)
Supplement: supp_mcv124_aob-15173-s01.pdf [file supp_mcv124_aob-15173-s01.pdf]

## SUPPLEMENTARY DATA

**Figure S1.** Daily temperatures recorded in the Teruel station during October and December 2001 (color symbols) as compared with the rest of the record (grey symbols, period 1950-2004) and (b) mean diurnal temperature range for December 2001 expressed as anomalies or deviations from the 1961-1990 average recorded in a network of European meteorological stations (the symbol indicates the study area). The maps were built using the <http://www.ecad.eu/> tools based on the E-OBS gridded climate dataset ver. 10.0.

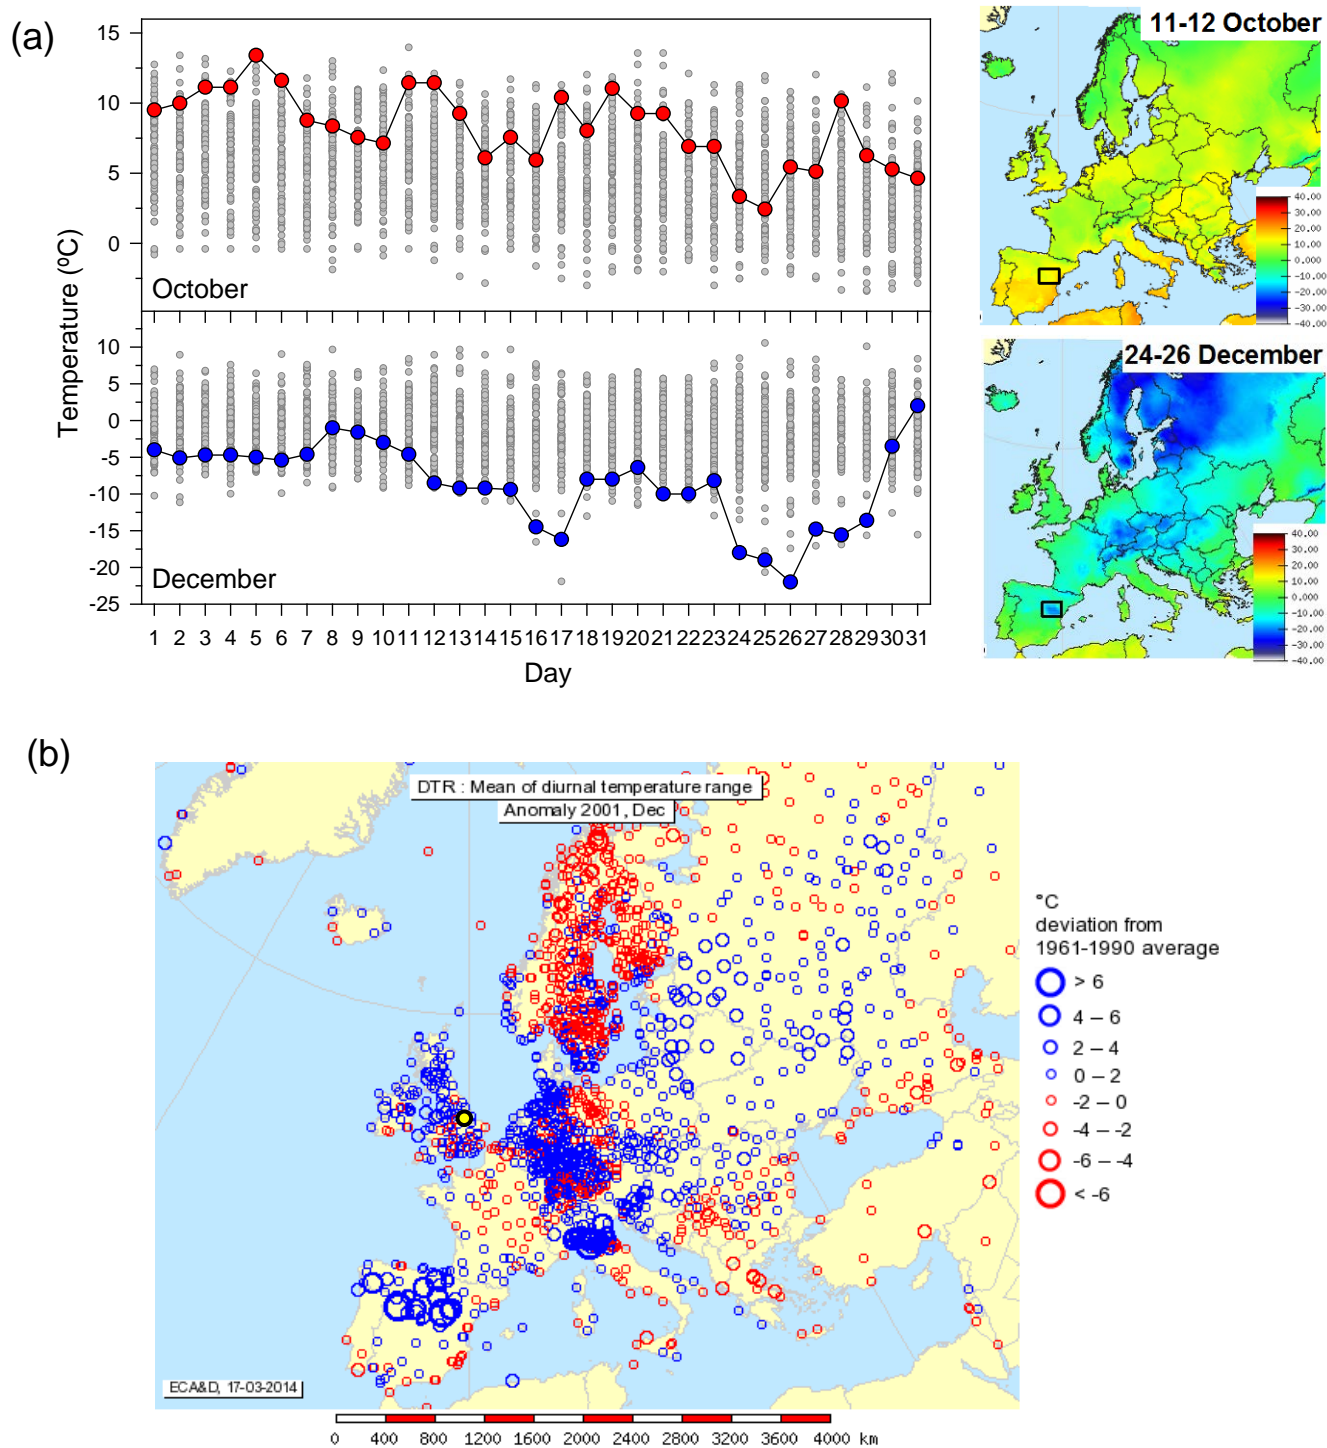

**Figure S2.** Effects of snow removal on soil minimum temperatures at the study site as related to air temperatures recorded from November to March from 2007 to 2011. In the lowermost plot the vertical bars indicate periods with snow depth higher than 10 cm.

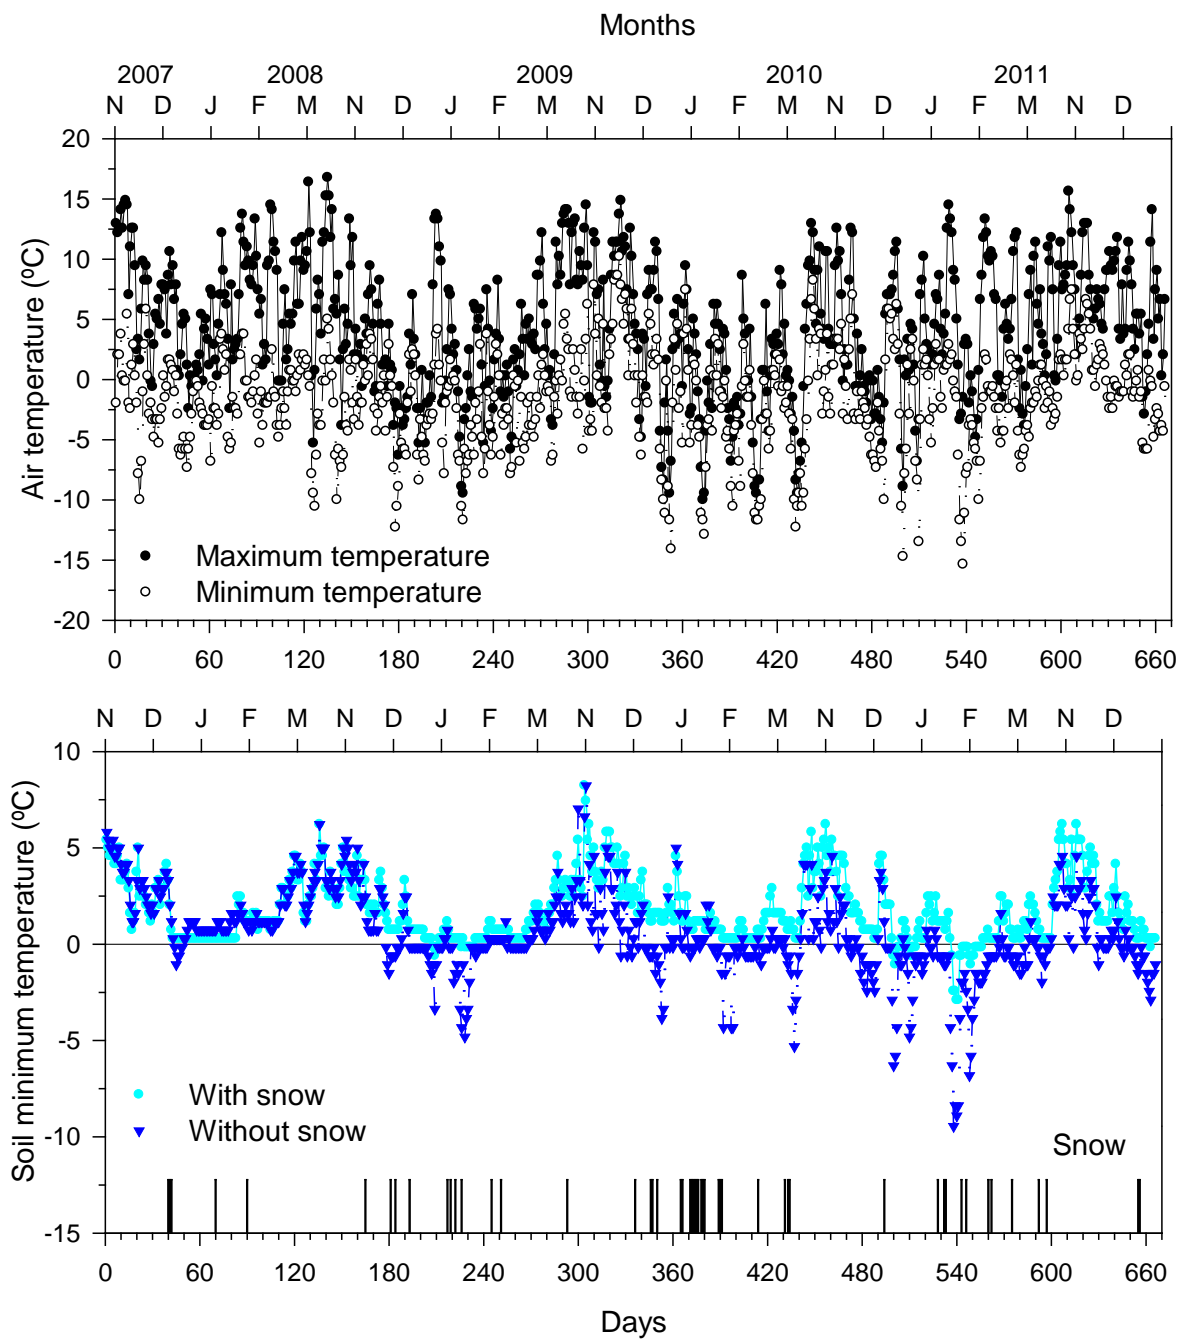

**Table S1.** Characteristics of local meteorological stations used to build the regional mean series.

| Station                   | Latitude (N) | Longitude (W) | Elevation (m a.s.l.) | Annual precipitation (mm) | Period (missing data %) | Annual mean temperature (°C) | Period (missing data %) |
|---------------------------|--------------|---------------|----------------------|---------------------------|-------------------------|------------------------------|-------------------------|
| Rubielos de Mora          | 40° 11'      | 0° 39'        | 949                  | 628                       | 1955-1997 (2.7)         | –                            | –                       |
| Rubielos de Mora-DGA      | 40° 12'      | 0° 39'        | 950                  | 492                       | 1993-2004 (2.0)         | –                            | –                       |
| Mora de Rubielos          | 40° 15'      | 0° 45'        | 1039                 | 467                       | 1948-1981 (5.6)         | –                            | –                       |
| Mora de Rubielos-DGA      | 40° 15'      | 0° 45'        | 1040                 | 453                       | 1991-2004 (6.1)         | 12.0                         | 1991-2004 (5.0)         |
| Alcalá de la Selva        | 40° 21'      | 0° 42'        | 1400                 | 558                       | 1942-2004 (8.7)         | 9.6                          | 1987-2004 (10.2)        |
| Teruel Escuela Normal     | 40° 21'      | 1° 06'        | 915                  | 380                       | 1968-1985 (6.0)         | 11.5                         | 1968-1985 (6.5)         |
| Teruel Instituto          | 40° 21'      | 1° 06'        | 916                  | 379                       | 1900-1967 (41.6)        | 11.7                         | 1900-1967 (24.6)        |
| Teruel La Salle           | 40° 21'      | 1° 06'        | 934                  | –                         | –                       | 11.4                         | 1951-1974 (43.4)        |
| Teruel                    | 40° 21'      | 1° 07'        | 900                  | 379                       | 1986-2004 (1.1)         | 12.1                         | 1986-2004 (0.4)         |
| Teruel “Obras Públicas”   | 40° 21'      | 1° 09'        | 900                  | 457                       | 1948-1990 (2.0)         | 11.9                         | 1948-1990 (4.9)         |
| Teruel “El Chantre”       | 40° 22'      | 1° 08'        | 900                  | 261                       | 1986-1994 (15.7)        | –                            | –                       |
| Mosqueruela               | 40° 22'      | 0° 27'        | 1510                 | 665                       | 1992-2004 (5.1)         | 9.9                          | 1992-2004 (1.1)         |
| Gúdar                     | 40° 27'      | 0° 43'        | 1587                 | 451                       | 1953-1987 (11.0)        | –                            | –                       |
| Fortanete                 | 40° 30'      | 0° 31'        | 1408                 | 650                       | 1929-1965 (52.3)        | –                            | –                       |
| Villarroya de los Pinares | 40° 32'      | 0° 40'        | 1320                 | 513                       | 1990-2004 (0.5)         | 9.2                          | 1990-2004 (1.0)         |
| Aliaga                    | 40° 40'      | 0° 42'        | 1115                 | 458                       | 1989-2004 (5.2)         | 10.2                         | 1989-2004 (8.2)         |
